# Supplementary material for: Hsa-miR-125b Therapeutic Role in Colon Cancer Is Dependent on the Mutation Status of the TP53 Gene
Source: MDPI journal article supplement (doi:10.3390/pharmaceutics13050664), 2021-05-06
Supplement: s1 [file s1]

# Supplementary Materials: Hsa-miR-125b Therapeutic Role in Colon Cancer Is Dependent on the Mutation Status of the TP53 Gene

Diana Cenariu, Alina-Andreea Zimta, Raluca Munteanu, Anca Onaciu, Cristian Moldovan, Ancuta Jurj, Lajos Raduly, Alin Moldovan, Adrian Florea, Liviuta Budisan, Laura-Ancuta Pop, Lorand Magdo, Mihai Albu, Rares Tonea, Mihai-Stefan Muresan, Calin Ionescu, Bogdan Petrut, Rares Buiga, Alexandru Irimie, Diana Gulei and Ioana Berindan-Neagoe

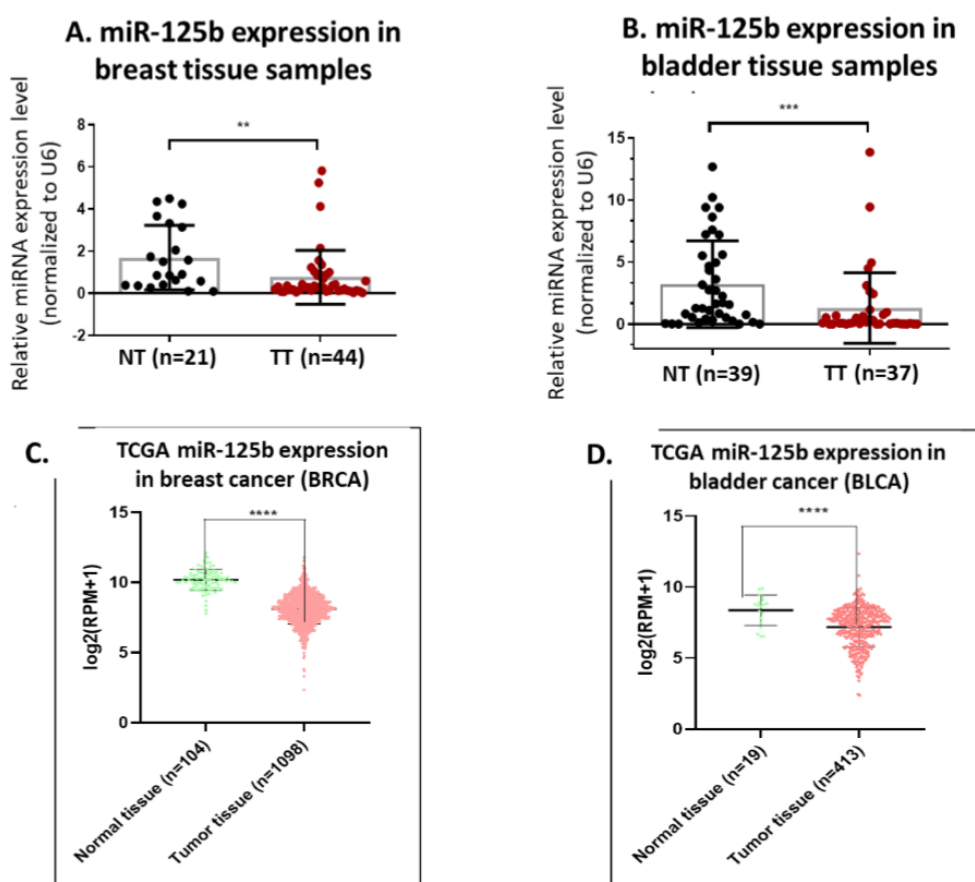

**Figure S1.** Figure S1: miR-125b expression in breast and bladder cancer from TCGA data and from local cohorts. **A.** RT-qPCR results of miR-125b-5p expression in double positive breast cancer tissue samples ( $n=44$ ) versus normal adjacent tissue samples ( $n=21$ ) (data presented as mean  $\pm$  S.D.;  $**p = 0.0014$ , two-tailed Mann Whitney test) **B.** RT-qPCR results of miR-125b-5p expression in bladder cancer tissue samples ( $n=37$ ) versus normal adjacent tissue samples ( $n=39$ ) (data presented as mean  $\pm$  S.D.;  $***p = 0.0003$ , two-tailed Mann Whitney test). Experiments including the local cohorts of patients were performed in duplicate for each sample and miR-125b-5p relative expression was expressed by fold-change and normalized to U6 snRNA **C.** Validation of miR-125b-5p expression (RNASeq count) on BRCA cohort from TCGA database in tumor tissue ( $n=1098$ ) compared to normal adjacent ones ( $n=104$ ) (data presented as mean  $\pm$  S.D.;  $****p < 0.0001$ , two-tailed Mann Whitney test). **D.** Validation of miR-125b-5p expression (RNASeq count) on BLCA cohort from TCGA database in tumor tissue ( $n=413$ ) compared to normal adjacent one ( $n=19$ ) (data presented as mean  $\pm$  S.D.;  $****p < 0.0001$ , two-tailed Mann Whitney test).
